# Supplementary material for: Moderate Elevation of Homocysteine Induces Endothelial Dysfunction through Adaptive UPR Activation and Metabolic Rewiring
Source: Preprints.org preprint supplement (doi:10.20944/preprints202309.0215.v1), 2023-09-05
Supplement: Supplementary file 1 [file supplementary]

**Figure S1**

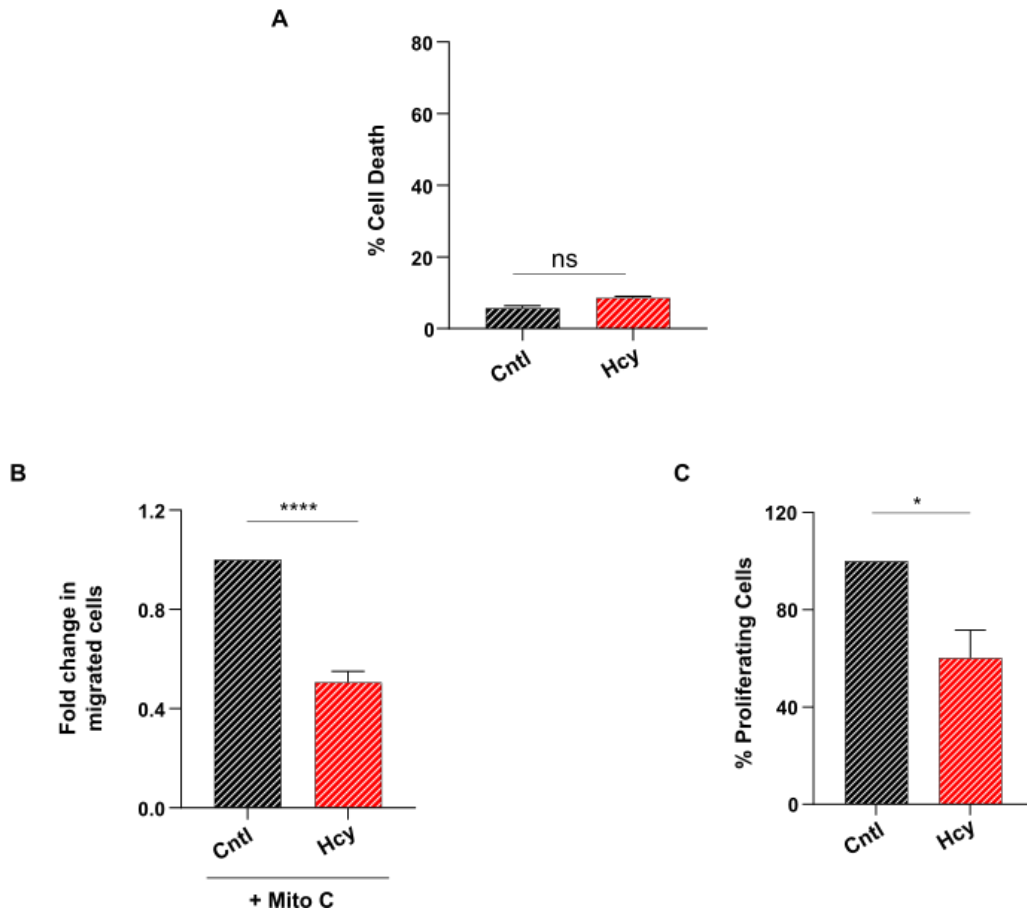

**Figure S1.** Primary HUVEC responds similarly to sub-lethal Hcy treatment. **(A)** Treatment of primary HUVEC cells with 2 mM Hcy for 24 h did not cause any cytotoxicity as measured by Trypan blue exclusion assay. **(B)** Bar plot showing that in presence of proliferation blocker Mitomycin C, migration of primary endothelial cells is drastically reduced upon sub-lethal Hcy treatment. **(C)** Percentage of proliferating cells, determined by BrdU cell proliferation assay, is significantly less in sub-lethal Hcy treated primary HUVEC compared to untreated control cells. Data are shown as Mean $\pm$ SEM with  $n \geq 3$ .

\* $P \leq 0.05$ , \*\*\*\* $P \leq 0.0001$  and ns is non-significant ( $P > 0.05$ ).

Figure S2

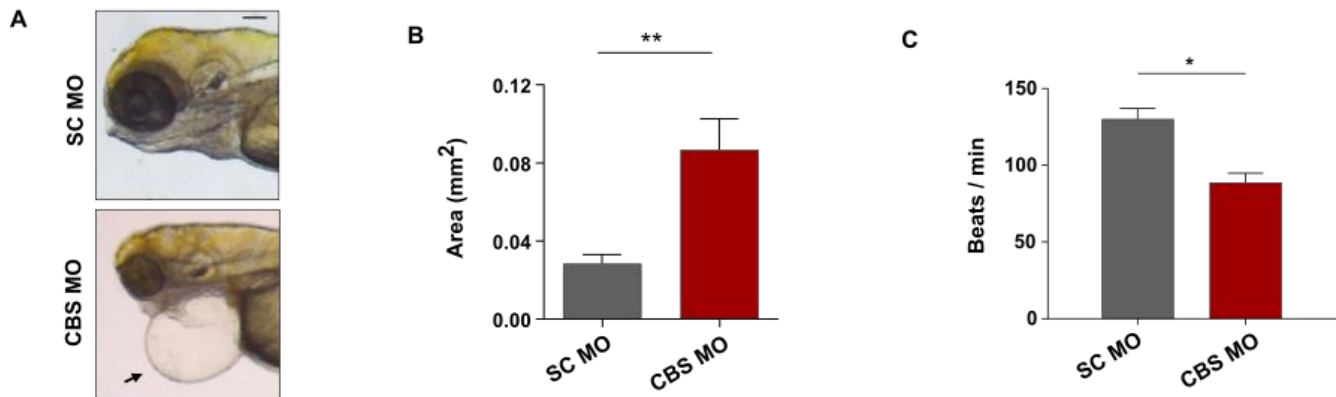

**Figure S2.** Sub-lethal HHcy induces abnormality in cardiac structure and function *in vivo*. **(A)** Representative brightfield images showing induction of severe pericardial edema in CBS MO injected embryos at 4 dpf. Arrow indicating enlarged pericardial area of CBS morphants. Scale bar, 0.1 mm. **(B)** Bar graph confirming pericardial area of CBS MO injected embryos is significantly higher compared to scrambled MO injected embryos at 4 dpf. **(C)** Bar graph showing that in comparison to SC MO injected embryos, heartbeat of CBS morphants is significantly reduced. Data are shown as Mean $\pm$ SEM with  $n \geq 3$ . \* $P \leq 0.05$  and \*\* $P \leq 0.01$ .

Figure S3

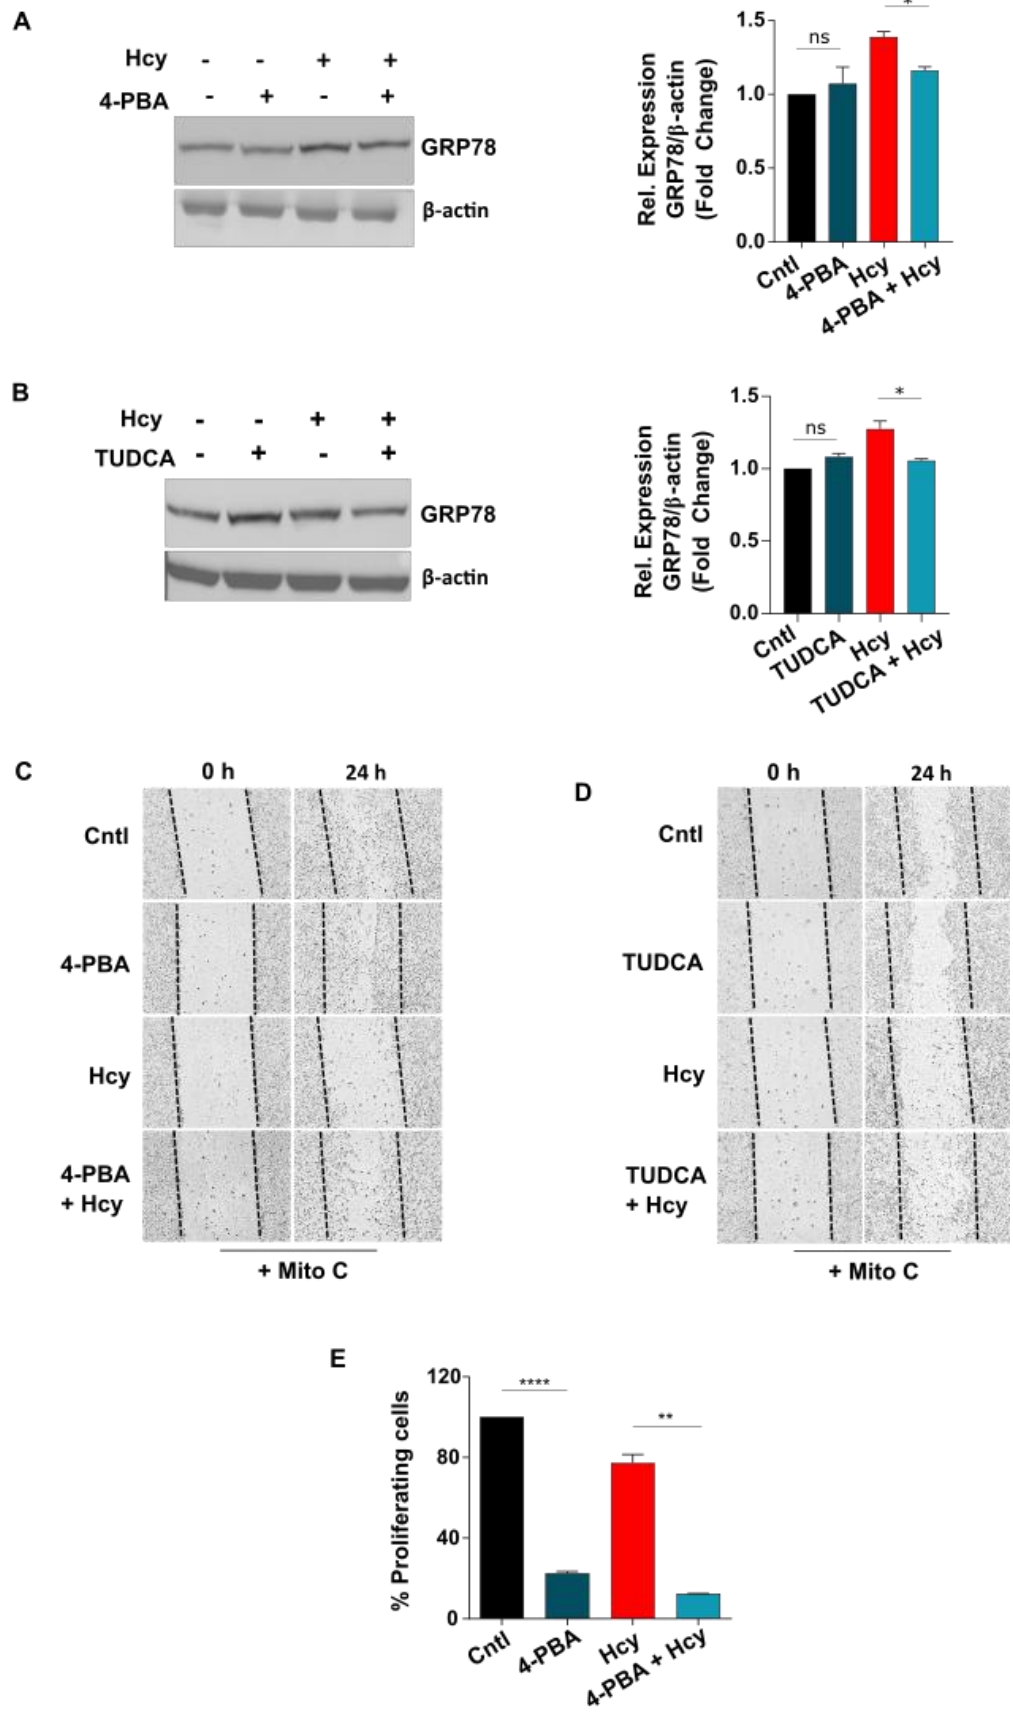

**Figure S3.** Effect of chemical chaperone mediated rescue of ER stress in sub-lethal HHcy treated endothelial cells. **(A) & (B)** Representative western blot showing sub-lethal Hcy treatment induced aberrant upregulation of GRP78 expression was rescued upon pre-treatment with 4-PBA (1 mM) and TUDCA (1 mM), respectively. As a loading control  $\beta$ -actin was used. Accompanying bar plots showing densitometric analysis (normalized to  $\beta$ -actin) of the protein bands. **(C) & (D)** Scratch wound assay images depicting that at 24 h in presence of proliferation blocker Mitomycin C, sub-lethal Hcy treatment induced endothelial migration defect is rescued upon pre-treatment with 4-PBA (1 mM) and TUDCA (1 mM), respectively. **(E)** Bar plot of BrdU cell proliferation assay showing no beneficial effect of 4-PBA (1 mM) on impairment of endothelial proliferation induced by 2 mM Hcy treatment at 24 h. Data are shown as Mean $\pm$ SEM with  $n \geq 3$ . \* $P \leq 0.05$ , \*\* $P \leq 0.01$ , \*\*\*\* $P \leq 0.0001$  and ns is non-significant ( $P > 0.05$ ).

Figure S4

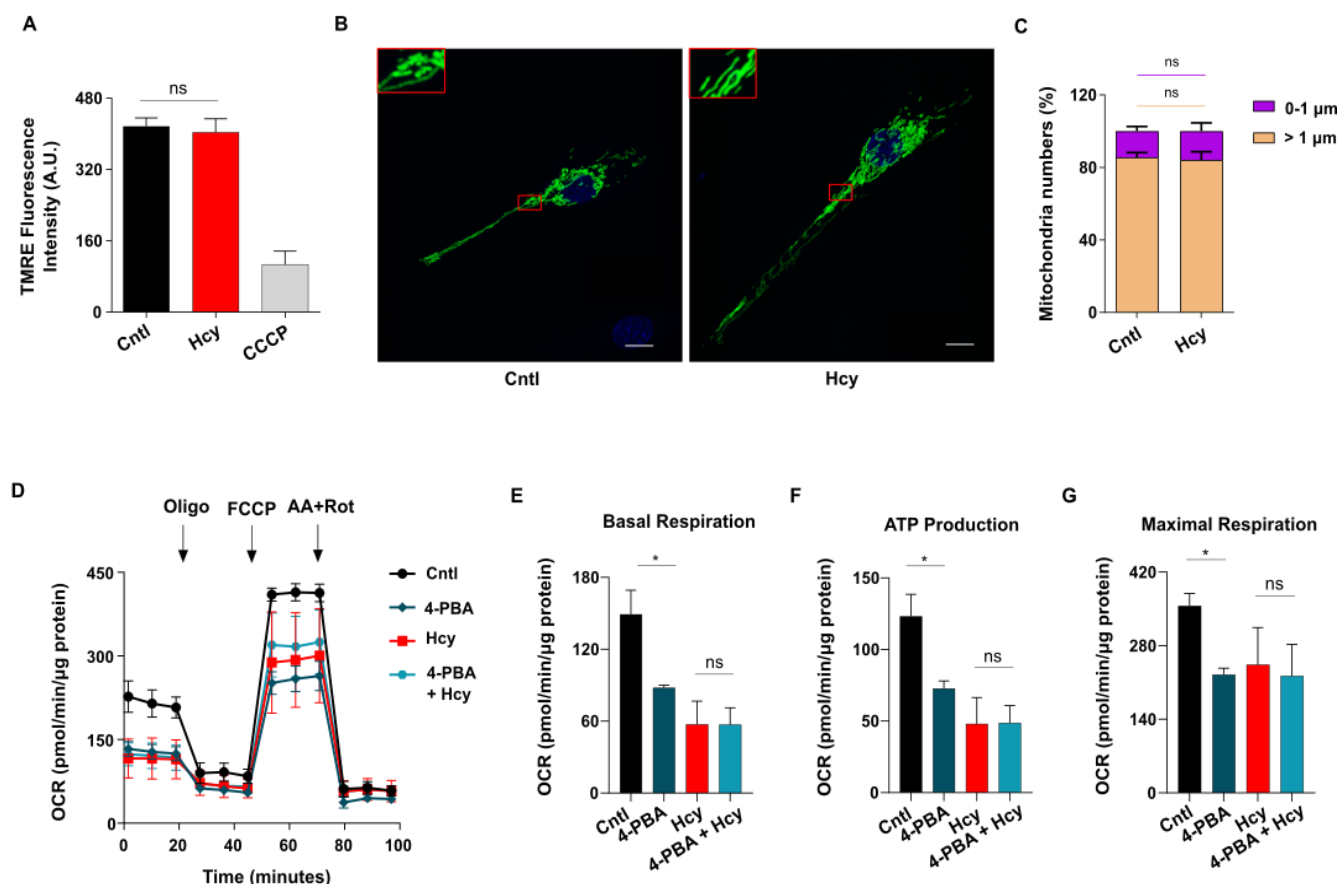

**Figure S4.** Sub-lethal HHcy induced respiration defect neither influence mitochondrial health nor is it an outcome of ER stress. **(A)** Bar plot representing no alteration of mitochondrial membrane potential upon 2 mM Hcy treatment for 24 h, as measured using potentiometric dye TMRE. An uncoupler CCCP was used as a positive control. **(B)** Representative confocal images of mitoGFP transduced HUVEC/TERT2 cells showing that sub-lethal Hcy treatment did not alter integrity of mitochondrial network of endothelial cells. Scale bar, 10  $\mu$ m. **(C)** Measurement of mitochondrial length by ImageJ analysis exhibiting no significant difference in between Hcy treated and non-treated cells. **(D)** OCR curves showing no improvement of sub-lethal Hcy treatment induced mitochondrial respiration defect in presence of chemical chaperone 4-PBA

(1 mM). (E), (F) & (G) Respective bars of basal respiration, ATP production and maximal respiration revealing no improvement upon 4-PBA (1 mM) pre-treatment as compared to only Hcy treated endothelial cells. Data are shown as Mean $\pm$ SEM with n  $\geq$  3. \*P $\leq$ 0.05 and ns is non-significant (P>0.05).

**Table S1****List of Primers used in this study for qPCR analysis**

| <b>Gene</b>                  | <b>Primer sequence</b> |
|------------------------------|------------------------|
| Zebrafish - VEGFAA - forward | GCCCACATACCCAAAGAAGG   |
| Zebrafish - VEGFAA - reverse | CTCATCGGGATACTCCTGGAT  |
| Zebrafish - VEGFR2 - forward | TTTGGTAGAGGGATCTCGTC   |
| Zebrafish - VEGFR2 - reverse | GCGTACCGATGACACATTTC   |
| Zebrafish - VEGFR1 - forward | ATGGGAACAGCAGCACTCTT   |
| Zebrafish - VEGFR1 - reverse | TGAAGACGGAGGGACAATC    |
| Zebrafish - 18S - forward    | TCGCTAGTTGGCATCGTTTATG |
| Zebrafish - 18S - reverse    | CGGAGGTTCTGAAGACGATCA  |
| Human - VEGFA - forward      | TCCAACTTCTGGGCTGTTCT   |
| Human - VEGFA - reverse      | CCCCTCTCCTCTTCCTTCTC   |
| Human - VEGFR2 - forward     | TGGGGATTGACTTCAACTGG   |
| Human - VEGFR2 - reverse     | TTCTTGGTCATCAGCCCACT   |
| Human - VEGFR1 - forward     | ACCACGCCCAGTCAAATTAC   |
| Human - VEGFR1 - reverse     | TGGGAATTGCTTTGGTCAAT   |
| Human - 18S - forward        | CTACCACATCCAAGGAAGCA   |
| Human - 18S - reverse        | TTTTTCGTCACTACCTCCCCG  |

**Table S2**

**Optimized parameters of different metabolites analyzed through targeted metabolomics**

| <b>Sr No.</b> | <b>Metabolite</b>            | <b>Precursor (m/z)</b> | <b>Fragment (m/z)</b> | <b>Peak type</b> | <b>Charge</b> | <b>Collision Energy (V)</b> |
|---------------|------------------------------|------------------------|-----------------------|------------------|---------------|-----------------------------|
| 1             | Pyruvate                     | 87                     | 42.99                 | Quantifier       | -1            | 10                          |
| 2             | Lactate                      | 89                     | 42.99                 | Quantifier       | -1            | 20                          |
|               |                              |                        | 40.99                 | Qualifier        | -1            |                             |
| 3             | Fumarate                     | 115                    | 71.01                 | Quantifier       | -1            | 20                          |
|               |                              |                        | 44.49                 | Qualifier        | -1            |                             |
| 4             | Succinate                    | 117.01                 | 99                    | Qualifier        | -1            | 20                          |
|               |                              |                        | 73.01                 | Quantifier       | -1            |                             |
| 5             | Oxaloacetate                 | 130.99                 | 87                    | Quantifier       | -1            | 20                          |
|               |                              |                        | 59                    | Qualifier        | -1            |                             |
| 6             | Malate                       | 133.01                 | 114.9                 | Quantifier       | -1            | 10                          |
|               |                              |                        | 72.98                 | Qualifier        | -1            |                             |
|               |                              |                        | 71.0                  | Qualifier        | -1            |                             |
| 7             | Phospho- enol pyruvate (PEP) | 166.97                 | 78.94                 | Quantifier       | -1            | 10                          |



|    |                                   |        |       |            |    |    |
|----|-----------------------------------|--------|-------|------------|----|----|
| 8  | Dihydroxyacetone phosphate (DHAP) | 168.98 | 96.95 | Qualifier  | -1 | 20 |
|    |                                   |        | 78.94 | Quantifier | -1 |    |
| 9  | 3-Phosphoglycerate (3PG)          | 184.98 | 96.95 | Qualifier  | -1 | 20 |
|    |                                   |        | 78.94 | Quantifier | -1 |    |
| 10 | Citrate                           | 191.01 | 110.9 | Quantifier | -1 | 20 |
|    |                                   |        | 86.99 | Qualifier  | -1 |    |
| 11 | Glucose-6-phosphate               | 259.02 | 138.9 | Qualifier  | -1 | 20 |
|    |                                   |        | 96.95 | Quantifier | -1 |    |
|    |                                   |        | 78.94 | Qualifier  | -1 |    |
| 12 | Fructose-1,6-bisphosphate         | 338.98 | 96.95 | Quantifier | -1 | 20 |
|    |                                   |        | 78.94 | Qualifier  | -1 |    |
